# Supplementary material
Source: PubMed Central journal article supplement (PMC4234033)
Supplement: NIHMS637267-supplement-Supplement.pdf [file NIHMS637267-supplement-Supplement.pdf]

Supplemental Figures and Tables.

“Aldehyde dehydrogenase-2 regulates nociception in rodent models of acute inflammatory pain”

Zambelli VO, Gross ER, Chen CH, Gutierrez VP, Cury Y, Mochly-Rosen D

Genomic ALDH2 region

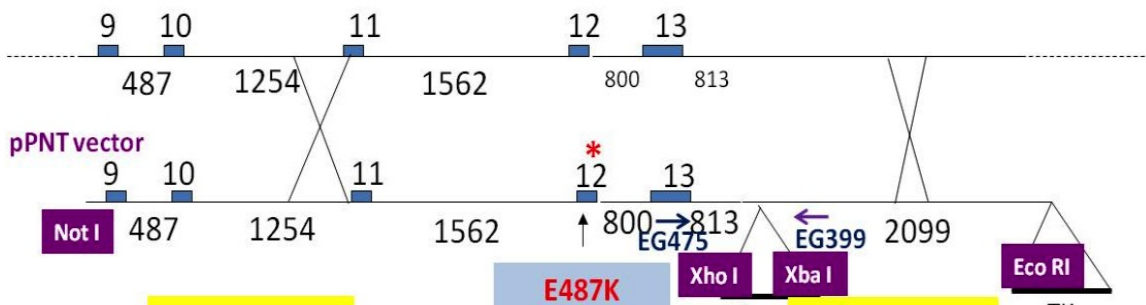

**Fig S1. Scheme for generation of ALDH2\*2 (E487K) knock-in mice.** The details regarding the protocol for the mutant mouse generation is described in the methods section.

A

| Speed (rpm) | Latency to fall (seconds) |       |
|-------------|---------------------------|-------|
|             | WT                        | *1/*2 |
| 4           | 60±0                      | 60±0  |
| 8           | 60±0                      | 60±0  |
| 15          | 58±2                      | 57±3  |
| 20          | 59±1                      | 57±2  |
| 24          | 59±1                      | 59±1  |
| 33          | 60±0                      | 60±0  |
| 40          | 48±5                      | 49±4  |

B

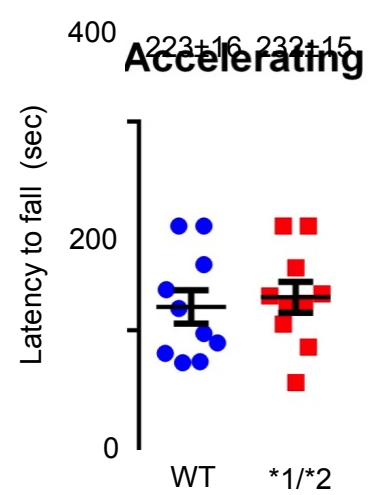

**Fig S2. Rotarod data.** **A.** Individual data points and speeds used for rotarod data presented in Fig 1D. Shown are data for wild type (WT; ALDH2\*1/\*1) and heterozygotic mice (ALDH2\*1/\*2) **B.** Scatogram of results from dynamic rotarod testing, with increased rotation speed from 4 to 40rpm over 5 minutes (n=10 mice/group, tested once per animal, mean±SEM).

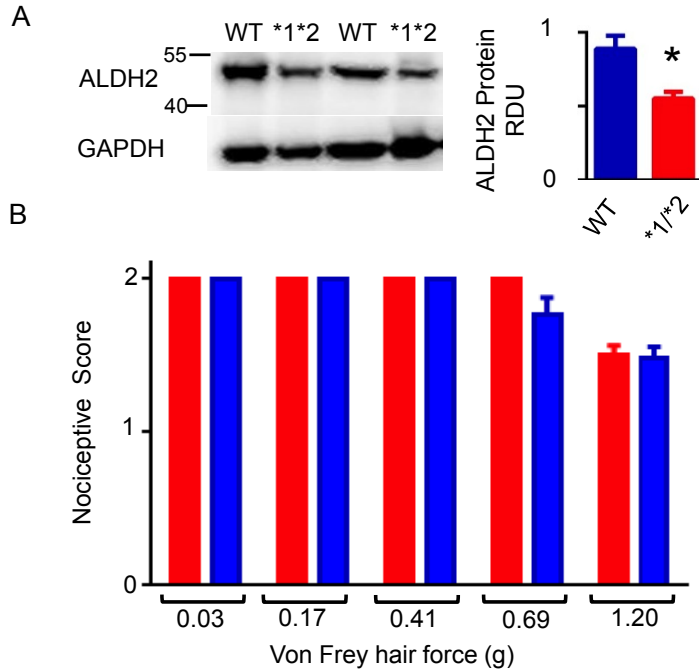

**Fig S3. ALDH2 protein level in mouse paw and additional nociceptive data.** **A.** Left, a representative Western blot for ALDH2 protein expression in mouse hind paw. Right, a histogram of averaged data from 7 mice/treatment group, biological replicates, expressed as relative densitometry units, RDU, \* $P < 0.01$  assessed by t-test. **B.** Baseline nociceptive threshold in mice for both wild type ALDH2 (blue bars) and heterozygous mice (ALDH2\*1/\*2; red bars) using the scoring technique for von Frey hairs ( $n=6-8$  mice/treatment group, mean  $\pm$  SEM).

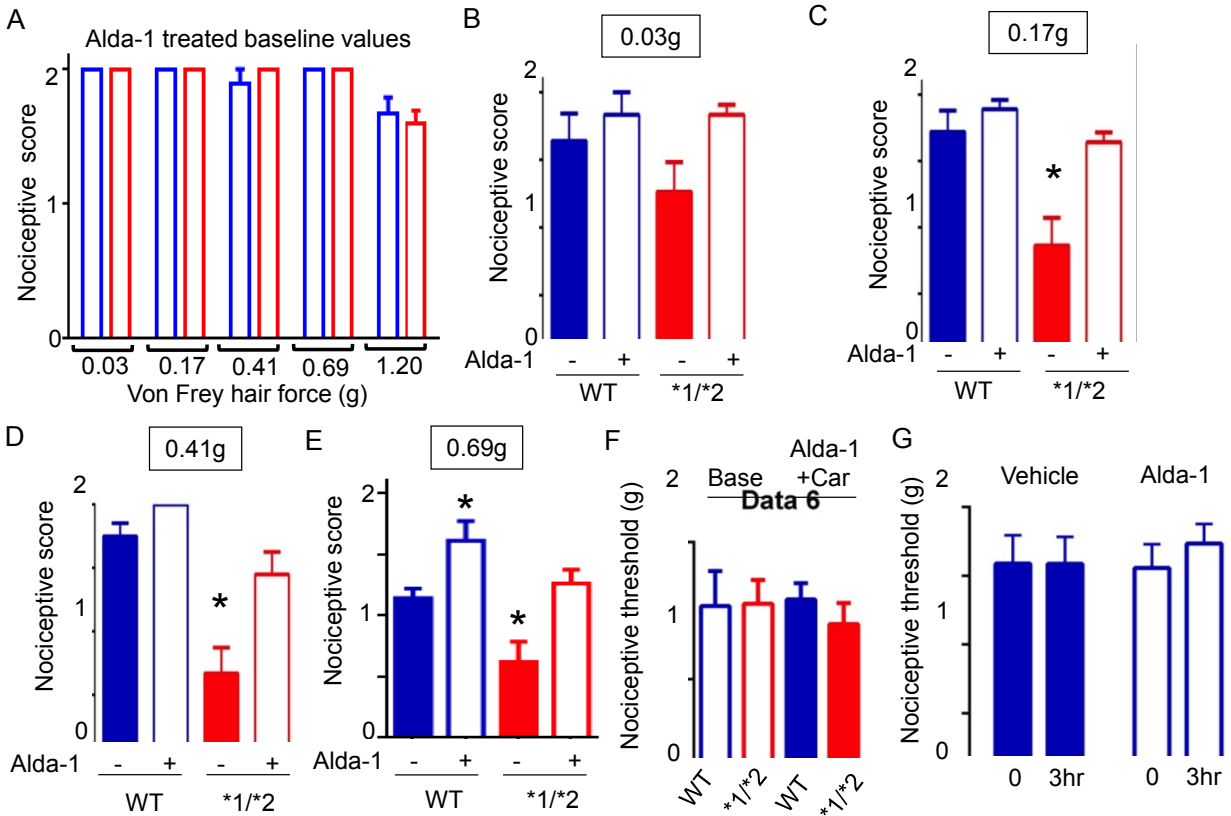

**Fig S4. Nociceptive testing.** **A.** Additional baseline nociceptive threshold measurements in mice using von Frey hairs (0.03, 0.17, 0.41, 0.69 and 1.20 grams, for both wild type ALDH2 (WT, blue bars) and heterozygous ALDH2\*1/\*2 mice (red bars) treated with Alda-1 (1mg/kg) using the scoring technique described in Figure 2D. **B-E.** Effect of Alda-1 on nociceptive tolerance for different von Frey hairs (boxed number) for wild type ALDH2 (blue bars) and heterozygous ALDH2\*1/\*2 mice (red bars) after carrageenan-induced insult. Alda-1 was administered at 3 time points; see **Fig. 2B**. (n=6-7 mice/treatment group; \*P<0.001). **F.** Alda-1 effect on nociceptive threshold during a carrageenan-induced inflammatory insult using the “up-down” method. **G.** Nociceptive threshold without an inflammatory insult using the up-down technique for wild type mice treated with Alda-1 as described in Fig. 2A. (n=8/treatment group). All data are presented as mean  $\pm$  SEM, \*P<0.05 as assessed by one-way ANOVA with Tukey’s correction.

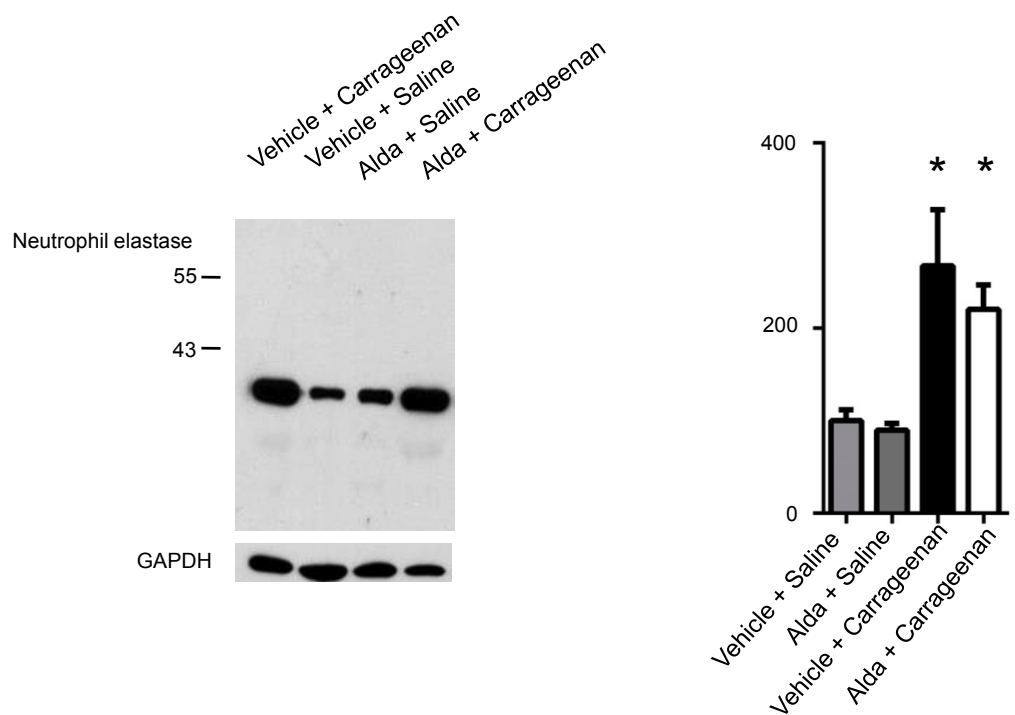

**Fig. S5. Neutrophil elastase protein levels.** Left, representative Western blot for neutrophil elastase. Right, histogram of neutrophil elastase levels for carrageenan treated and carrageenan-nontreated groups (n=6 biological replicates/group, mean  $\pm$  SEM, expressed as a percentage change from vehicle alone \*P<0.05 compared to respective carrageenan treated groups assessed by t-test).

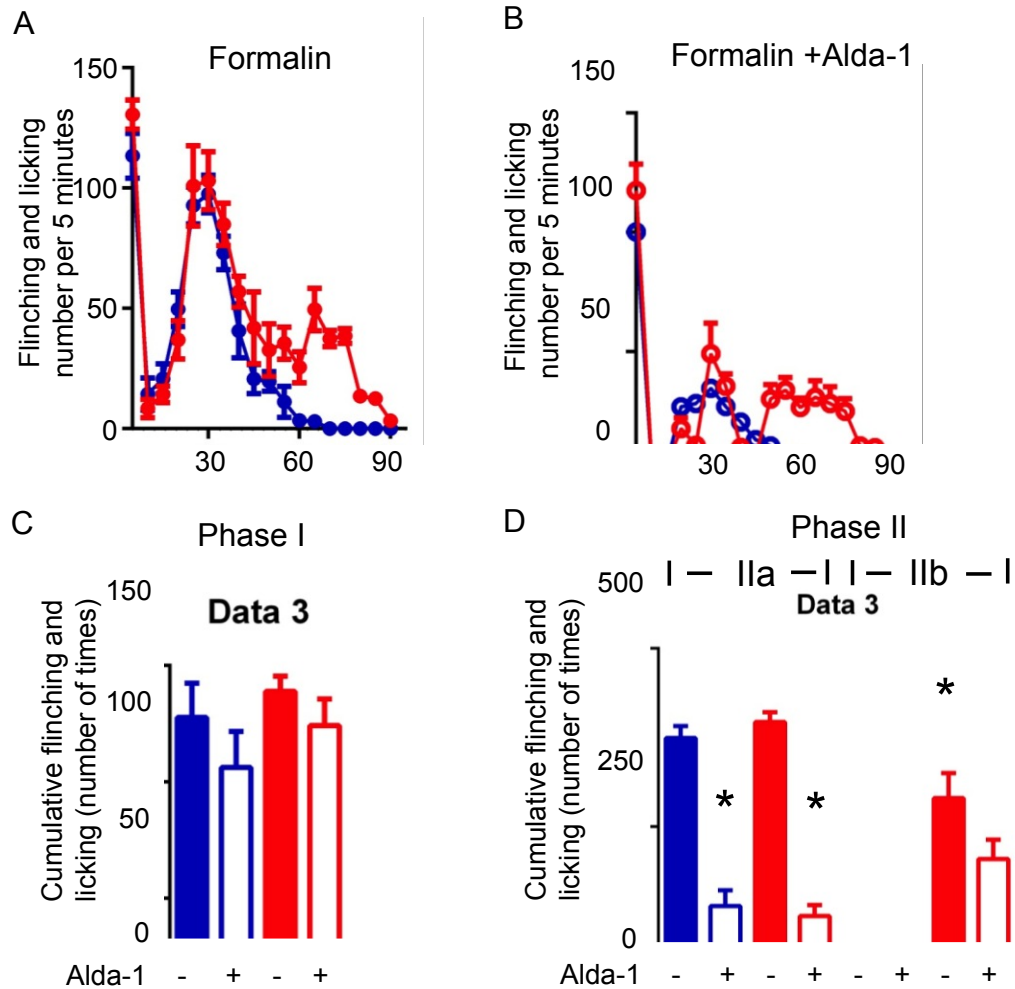

**Fig S6. Formalin-induced pain model.** **A.** Flinching and licking for wild type mice (red) and ALDH2\*1/\*2 mice (blue) when subjected to 2% formalin injected into the paw. **B.** Mice treated as in (A.) were also given Alda-1 with flinching and licking responses were measured. **C.** Cumulative phase I flinching and licking responses for each group. **D.** Phase IIa and IIb cumulative flinching and licking responses. n=8 animals/treatment group, blue data points and bars, wild type mice; red data points and bars, ALDH2\*1/\*2 mice, mean ± SEM, \*=P<0.01 as assessed by one-way ANOVA with Tukey's correction.

| Isozyme  | % Enzyme Activity |              |
|----------|-------------------|--------------|
|          | Vehicle           | Alda-1       |
| ALDH1A1  | 100 ± 4.6         | 91 ± 5.1     |
| ALDH2 *1 | 100 ± 2.3         | 193 ± 4.3**  |
| ALDH2 *2 | 100 ± 7.4         | 202 ± 11.0** |
| ALDH3A1  | 100 ± 4.7         | 99 ± 6.9     |
| ALDH4A1  | 100 ± 1.6         | 96 ± 2.0     |
| ALDH5A1  | 100 ± 1.9         | 97 ± 6.6     |
| ALDH7A1  | 100 ± 3.1         | 96 ± 3.7     |

**Table S1. ALDH activation by Alda-1.** 10 µg of the indicated human recombinant ALDH isozyme were used in standard ALDH enzymatic assays using 10 mM acetaldehyde as substrate. DMSO was the vehicle of Alda-1. The Alda-1 concentration was 20 µM in each assay. Data were collected and analyzed from 3 technically independent assays using recombinant ALDH enzymes (mean ± SEM, \*\*P<0.01 as assessed by t-test).
